# Supplementary material for: Kinetics of Tear Fluid Proteins after Endothelial Keratoplasty and Predictive Factors for Recovery from Corneal Haze
Source: MDPI journal article supplement (doi:10.3390/jcm9010063), 2019-12-26
Supplement: s1 [file s1]

## Supplementary Materials

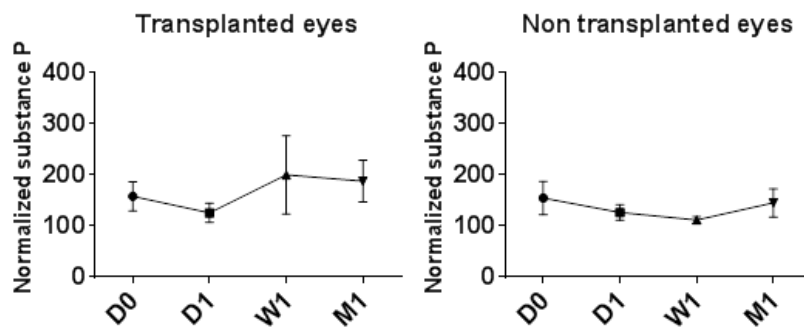

**Figure S1. Substance P expression levels in the tear fluid before and after EK.**

Mean values normalized with total protein expression are shown. n=8.
